# Supplementary material
Source: PubMed Central journal article supplement (PMC8664689)
Supplement: ofab495_suppl_supplementary_appendix_table_1.pdf [file ofab495_suppl_supplementary_appendix_table_1.pdf]

**Supplementary Appendix Table 1 Summary of survey results**

| Survey item                                                                                                                                                                                                                           | N (%)                                     | Median [IQR] |
|---------------------------------------------------------------------------------------------------------------------------------------------------------------------------------------------------------------------------------------|-------------------------------------------|--------------|
| <b>Testing for COVID frequently (e.g. weekly) is beneficial to me</b><br>Strongly agree/Agree/Slightly agree<br>Neither agree nor disagree<br>Strongly disagree/Disagree/Slightly disagree                                            | 213<br>206 (97%)<br>5 (2%)<br>2 (1%)      | 7(6,7)       |
| <b>If I have weekly COVID tests it is beneficial for people who live with me</b><br>Strongly agree/Agree/Slightly agree<br>Neither agree nor disagree<br>Strongly disagree/Disagree/Slightly disagree                                 | 214<br>209 (98%)<br>3 (1.5%)<br>1 (0.5%)  | 7(6,7)       |
| <b>If I have weekly COVID tests it is beneficial for my friends and family</b><br>Strongly agree/Agree/Slightly agree<br>Neither agree nor disagree<br>Strongly disagree/Disagree/Slightly disagree                                   | 214<br>213 (99.5%)<br>1 (0.5%)<br>0       | 7(7,7)       |
| <b>If I have weekly COVID tests it is beneficial for my wider community</b><br>Strongly agree/Agree/Slightly agree<br>Neither agree nor disagree<br>Strongly disagree/Disagree/Slightly disagree                                      | 214<br>211 (98.5%)<br>3 (1.5%)<br>0       | 7(7,7)       |
| <b>It is important for me to know whether I have COVID-19 or not</b><br>Strongly agree/Agree/Slightly agree<br>Neither agree nor disagree<br>Strongly disagree/Disagree/Slightly disagree                                             | 214<br>211 (98.5%)<br>2 (1%)<br>1 (0.5%)  | 7(6,7)       |
| <b>I believe the test provides reliable and accurate results</b><br>Strongly agree/Agree/Slightly agree<br>Neither agree nor disagree<br>Strongly disagree/Disagree/Slightly disagree                                                 | 214<br>192 (90%)<br>14 (6.5%)<br>8 (3.5%) | 6(5,6)       |
| <b>I would self-isolate if I received a positive test result from the FACTS COVID test</b><br>Strongly agree/Agree/Slightly agree<br>Neither agree nor disagree<br>Strongly disagree/Disagree/Slightly disagree                       | 213<br>209 (98%)<br>4 (2%)<br>0           | 7(7,7)       |
| <b>I would self-isolate if I received a positive test result from a laboratory (e.g. NHS or university) test</b><br>Strongly agree/Agree/Slightly agree<br>Neither agree nor disagree<br>Strongly disagree/Disagree/Slightly disagree | 214<br>214 (100%)<br>0<br>0               | 7(7,7)       |
| <b>I am confident I can carry out the test</b><br>Strongly agree/Agree/Slightly agree<br>Neither agree nor disagree<br>Strongly disagree/Disagree/Slightly disagree                                                                   | 212<br>208 (98%)<br>3 (1.5%)<br>1 (0.5%)  | 7(6,7)       |
| <b>I am confident I can interpret the test result</b><br>Strongly agree/Agree/Slightly agree<br>Neither agree nor disagree                                                                                                            | 213<br>213 (100%)<br>0                    | 7(7,7)       |

|                                                                   |             |        |
|-------------------------------------------------------------------|-------------|--------|
| Strongly disagree/Disagree/Slightly disagree                      | 0           |        |
| <b>Self-testing is easy to fit into my usual activities</b>       | 214         | 7(6,7) |
| Strongly agree/Agree/Slightly agree                               | 205 (95.7%) |        |
| Neither agree nor disagree                                        | 2 (1%)      |        |
| Strongly disagree/Disagree/Slightly disagree                      | 7 (3.3%)    |        |
| <b>Self-testing every 7 days is easy for me to remember to do</b> | 214         | 7(6,7) |
| Strongly agree/Agree/Slightly agree                               | 206 (96%)   |        |
| Neither agree nor disagree                                        | 4 (2%)      |        |
| Strongly disagree/Disagree/Slightly disagree                      | 4 (2%)      |        |
| <b>I intend to self-test again in the next week</b>               | 213         | 7(7,7) |
| Strongly agree/Agree/Slightly agree                               | 201 (94%)   |        |
| Neither agree nor disagree                                        | 6 (3%)      |        |
| Strongly disagree/Disagree/Slightly disagree                      | 6 (3%)      |        |
| <b>I believe it is safe to have the test</b>                      | 214         | 7(7,7) |
| Strongly agree/Agree/Slightly agree                               | 213 (99.5%) |        |
| Neither agree nor disagree                                        | 1 (0.5%)    |        |
| Strongly disagree/Disagree/Slightly disagree                      | 0           |        |
